# Supplementary material for: Tumor Associated Stromal Cells Play a Critical Role on the Outcome of the Oncolytic Efficacy of Conditionally Replicative Adenoviruses
Source: PubMed Central journal article supplement (PMC2663040; doi:10.1371/journal.pone.0005119), 2009-04-08

**A**

**A375N**

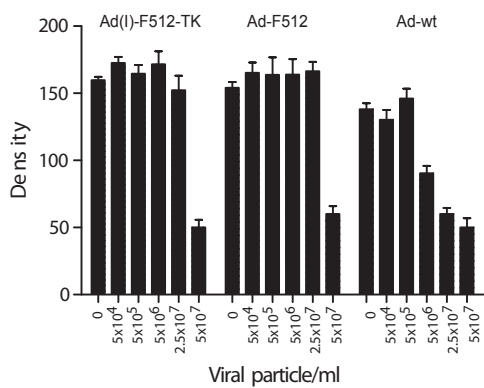

**MEL888**

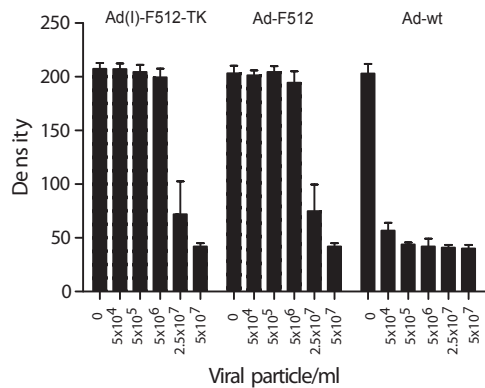

**Mel-J-N**

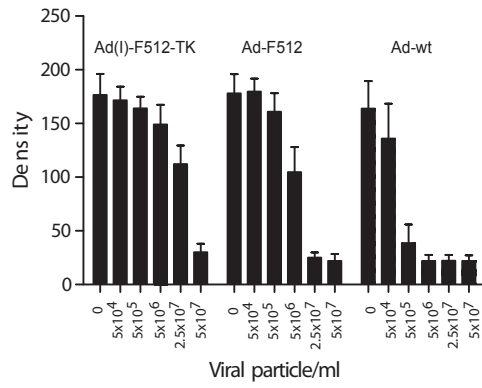

**SB2**

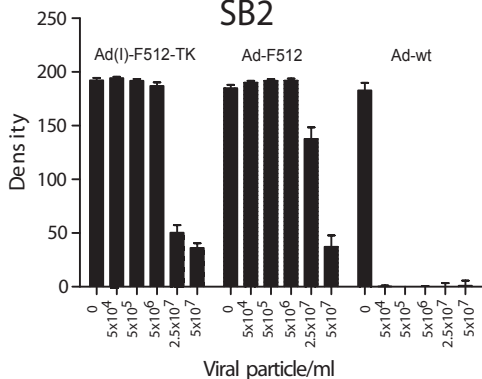

**IIB-MEL-Les**

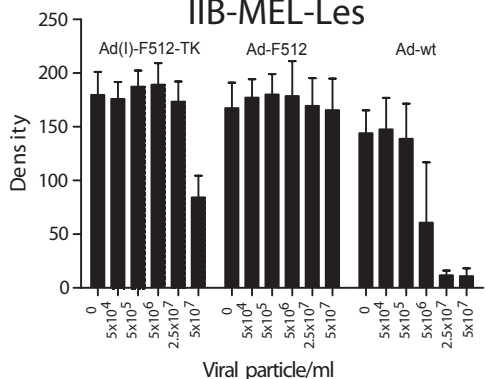

**T-47D**

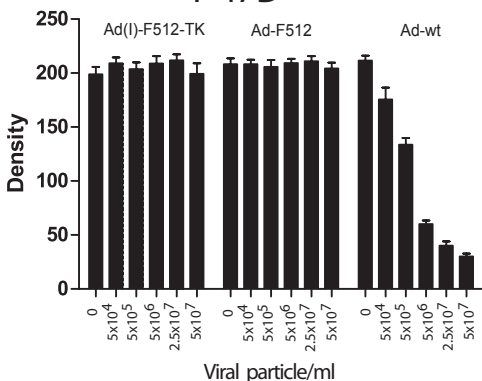

**MCF-7**

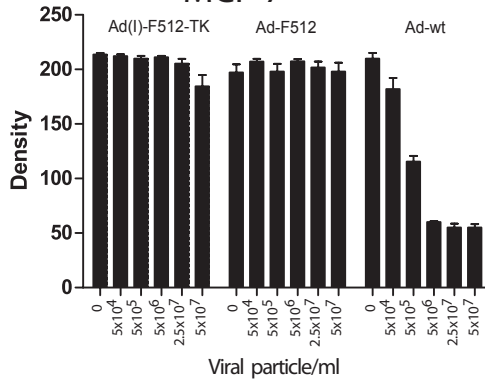

**MDA-231**

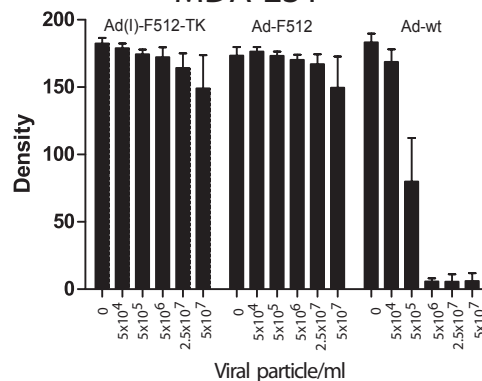

**BxpC3**

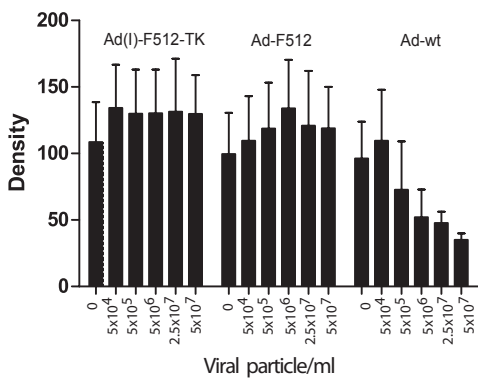

**MIA PaCa-2**

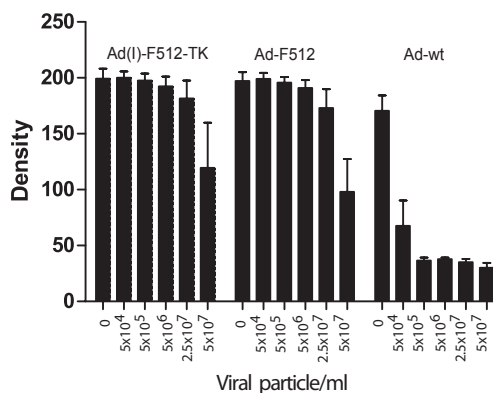

**B**

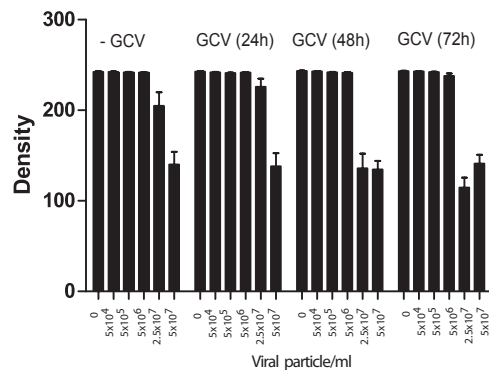

Supplement: pone.0005119.s002.pdf [file pone.0005119.s002.pdf]
