# Supplementary material for: Tumor Associated Stromal Cells Play a Critical Role on the Outcome of the Oncolytic Efficacy of Conditionally Replicative Adenoviruses
Source: PubMed Central journal article supplement (PMC2663040; doi:10.1371/journal.pone.0005119), 2009-04-08

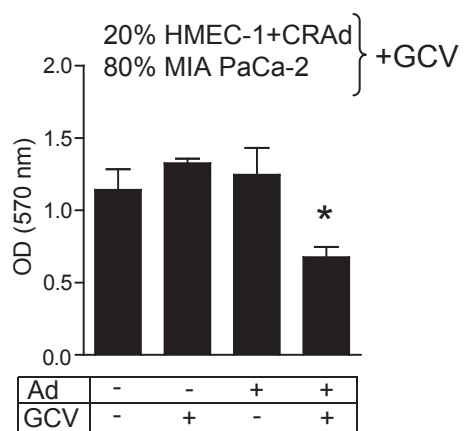

Supplement: pone.0005119.s008.pdf [file pone.0005119.s008.pdf]
