# Supplementary material for: Tumor Associated Stromal Cells Play a Critical Role on the Outcome of the Oncolytic Efficacy of Conditionally Replicative Adenoviruses
Source: PubMed Central journal article supplement (PMC2663040; doi:10.1371/journal.pone.0005119), 2009-04-08

**A** CRAd Activity+Conditioned medium of stromal cells (serial dilutions)

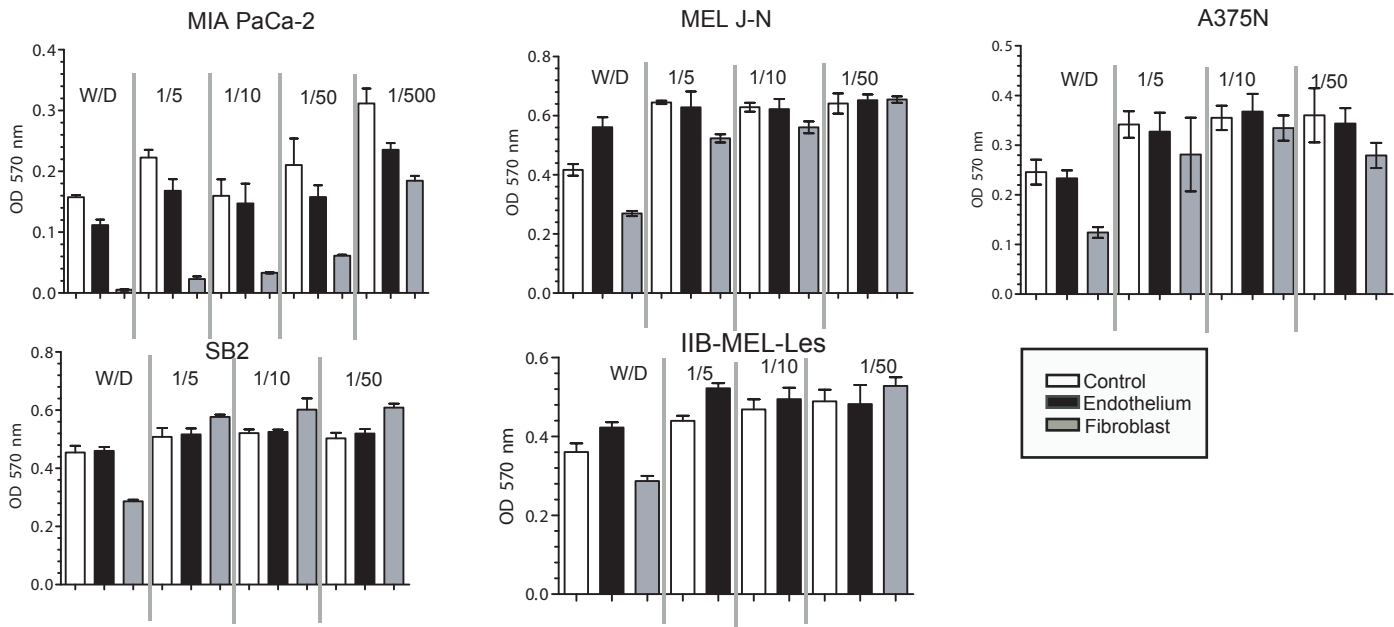

**B** CRAd Activity+Conditioned medium of infected stromal cells

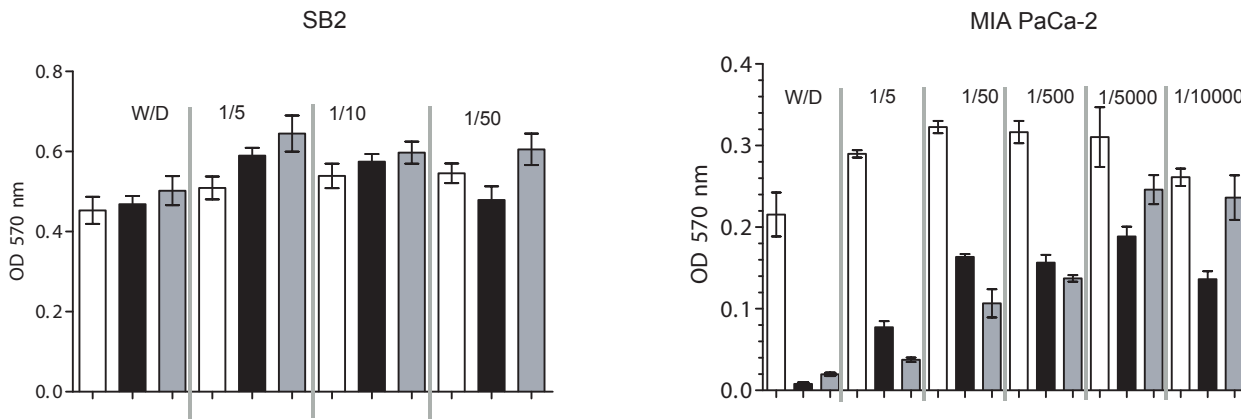

Supplement: pone.0005119.s009.pdf [file pone.0005119.s009.pdf]
